# Supplementary material
Source: Springer Nature journal article supplement (https://www.springermedizin.de/resource/supplementary/12865_2013_549_MOESM7_ESM.pdf/9428186)

**A**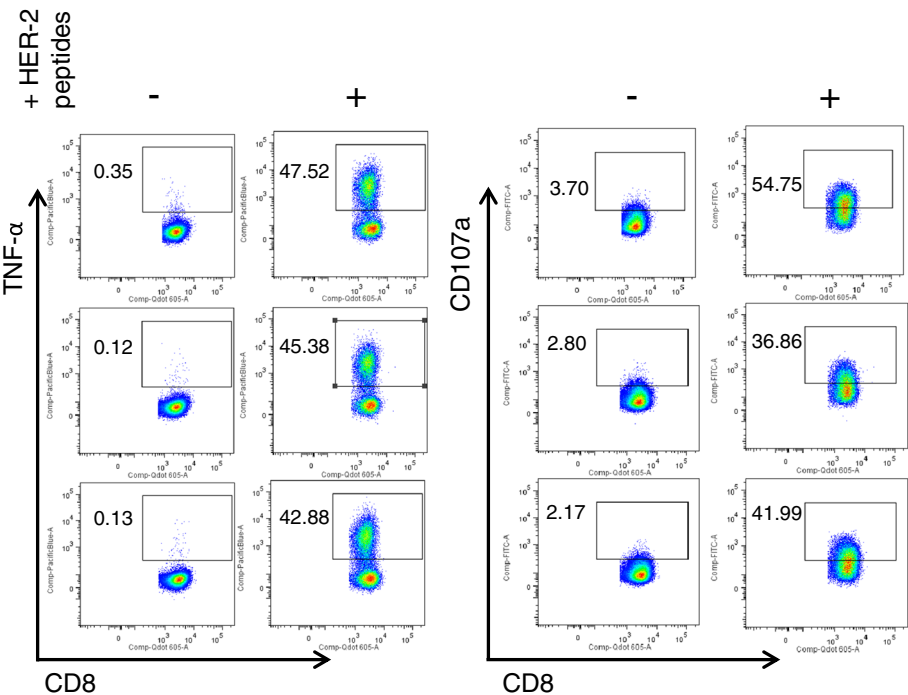**B**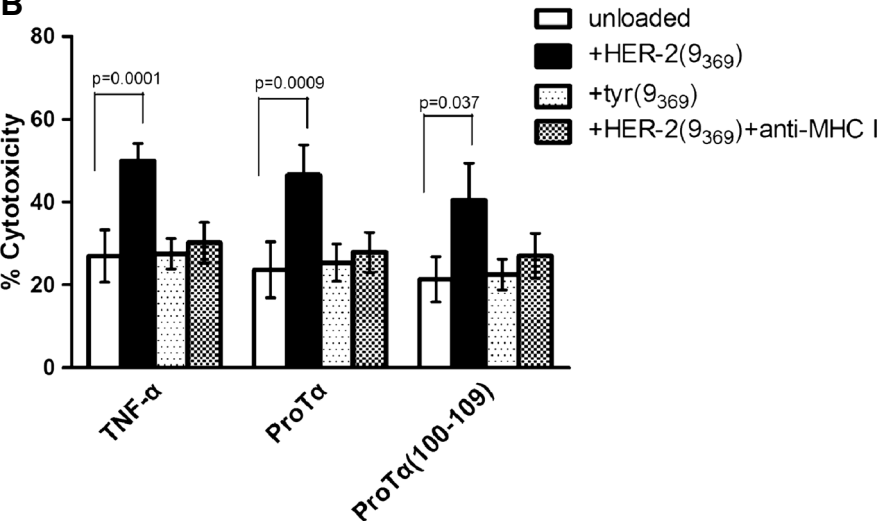

Supplement: MOESM7 [file 9428186]
